# Supplementary material for: Chlorometallate and palladium cluster complexes of wide-span diimine and diamine ligands
Source: Royal Society of Chemistry journal article supplement (doi:10.1039/c1dt10861a), 2011-01-01
Supplement: c1dt10861a.pdf [file c1dt10861a.pdf]

## Supplementary Information

“Chlorometallate and palladium cluster complexes of wide-span diimine and diamine ligands”

John S. Hart, Simon Parsons, and Jason B. Love

### General experimental details

The synthesis of 1,4-dibromomethyl-2,3,5,6-tetramethylbenzene and 2,3,5,6-tetramethylterephthalaldehyde were carried out as described in the literature.<sup>1, 2</sup> All synthetic procedures were carried out using commercial-grade solvent in air and all chemicals were used as purchased. <sup>1</sup>H spectra were recorded at 298 K on a Bruker AVA400 at 399.90 MHz and <sup>13</sup>C{<sup>1</sup>H} NMR spectra were recorded at 298 K on a Bruker AVA500 at 125.76. All <sup>1</sup>H NMR were referenced internally to residual protio-solvent resonances. Electrospray mass spectra were recorded using a Thermo Finnigan LCQ Classic ion trap mass spectrometer, IR spectra on a Perkin Elmer Spectrum 65 FTIR or a JASCO FT/IR-410 spectrometer as solids or KBr disks and UV-Vis spectra were recorded on a Varian Cary 50 scan UV-Visible spectrophotometer. Elemental analyses were carried out by Mr. Stephen Boyer at the London Metropolitan University.

### Synthesis of L<sup>ImAr</sup>

To solution of 2,3,5,6-tetramethylterephthalaldehyde (2.0 g, 11 mmol) in MeCN (50 mL), was added 2,6-di(isopropyl)aniline (3.72 g, 22 mmol). Trifluoroacetic acid (1 mL) was added to the solution dropwise. The mixture was stirred for 1 h at room temperature after which it was neutralised using KOH (aq). The yellow precipitate was filtered and washed with MeCN (3 x 10 mL) and dried under vacuum to afford 4.82 g, 86 % of L<sup>ImAr</sup> as a colourless solid.

<sup>1</sup>H NMR (400 MHz, CDCl<sub>3</sub>): δ<sub>H</sub> 8.67 (s, 2H, imine CH), 7.27–7.15 (m, 6H, aromatic), 3.18 (sep, <sup>3</sup>J<sub>HH</sub> = 6.81 Hz, 4H, isopropyl CH), 2.55 (s, 12H, Me), 1.25 (d, <sup>3</sup>J<sub>HH</sub> = 6.81 Hz, 24H, Me); <sup>13</sup>C{<sup>1</sup>H} NMR (500 MHz, CDCl<sub>3</sub>): δ<sub>C</sub> 164.6, 149.6 (q), 137.9 (q), 135.8 (q), 134.6 (q), 124.4, 123.3, 28.0, 24.0, 16.8; Found: C, 84.76, H, 9.57, N, 5.47 % C<sub>36</sub>H<sub>48</sub>N<sub>2</sub> requires: C, 84.98, H, 9.51, N, 5.51 %; ESIMS (+ve ion): m/z 509.22 ([M+H]<sup>+</sup>, 100 %); IR (ATR): ν 1630 (C=N), 1588 (C=C) cm<sup>-1</sup>.

### Synthesis of L<sup>ImR</sup>

To a solution of 2,3,5,6-tetramethylterephthalaldehyde (4.29 g, 23 mmol) in MeCN (100 mL) was added tert-butylamine (4.12 g, 56 mmol). Trifluoroacetic acid (0.5 mL) was added dropwise and the mixture stirred for 1 h at room temperature. The resulting colourless precipitate was filtered, washed with MeCN (3 x 10 mL), and dried under vacuum to afford 4.9 g, 70 % of the L<sup>ImR</sup>.

<sup>1</sup>H NMR (400 MHz, CDCl<sub>3</sub>): δ<sub>H</sub> 8.55 (s, 2H, CH imine), 2.17 (s, 12H, Me), 1.38 (s, 18H, <sup>t</sup>Bu); <sup>13</sup>C{<sup>1</sup>H} NMR (500 MHz, CDCl<sub>3</sub>): δ<sub>C</sub> 158.1, 136.8 (q), 131.7 (q), 58.2 (q), 29.7, 16.3; Found: C, 80.03, H, 10.57, N, 9.05 % C<sub>20</sub>H<sub>32</sub>N<sub>2</sub> requires: C, 79.94, H, 10.73, N, 9.32 %; ESIMS (+ve ion): m/z 301.09([M]<sup>+</sup>, 100 %), 245.10 ([M-<sup>t</sup>Bu]<sup>+</sup>, 14.5 %); IR (ATR): ν 1651 (C=N) cm<sup>-1</sup>

### Synthesis of L<sup>AmAr</sup>

**Method 1:** To a mixture of 1,4-dibromomethyl-2,3,5,6-tetramethylbenzene (5.6 g) in MeCN (150 mL), triethylamine (5 mL) was added, followed by 2,6-diisopropylaniline. The mixture was boiled for 8 h, after which the solvents were evaporated under reduced pressure. The residues were dissolved in water, extracted into CH<sub>2</sub>Cl<sub>2</sub> (100 mL), and evaporated to dryness. The crude colourless solids were recrystallised from hot MeCN to afford 4.8 g, 53 % of L<sup>AmAr</sup> as colourless microcrystals.

**Method 2:** To a solution of 2,3,5,6-tetramethylterephthalaldehyde (0.1 g, 0.192 mmol) in THF (5 mL) was added a solution of NaBH<sub>4</sub> (0.08 g, 2.11 mmol) in MeOH (5 mL). The mixture was stirred vigorously for 2 h, after which the solvents were evaporated under reduced pressure. The residues were taken up in water (10 mL) and extracted with CH<sub>2</sub>Cl<sub>2</sub>. The organic layer was dried over MgSO<sub>4</sub>, and the solvents evaporated under reduced pressure to yield a colourless crude solid that was recrystallised from MeCN to afford 0.02 g, 20 % of L<sup>AmAr</sup> as a colourless solid.

<sup>1</sup>H NMR (400 MHz, CDCl<sub>3</sub>): δ<sub>H</sub> 7.16 – 7.05 (m, 6H, aromatics), 4.22 (s, 4H, CH<sub>2</sub>), 3.30 (sep, <sup>3</sup>J<sub>HH</sub> = 6.63 Hz, 4H, CH), 3.07 (br. s, 2H, NH), 2.35 (s, 12H, CH<sub>3</sub>), 1.25 (d, <sup>3</sup>J<sub>HH</sub> = 6.63 Hz, 24H, CH<sub>3</sub>); <sup>13</sup>C{<sup>1</sup>H} NMR (500 MHz, CDCl<sub>3</sub>): δ<sub>C</sub> 144.2 (q), 141.7 (q), 136.2 (q), 133.5 (q), 123.8, 123.3, 50.8,

28.1, 24.4, 16.9. Found: C, 84.46, H, 10.13, N, 5.51 %  $C_{36}H_{52}N_2$  requires: C, 84.32, H, 10.22, N, 5.46 %; ESIMS (+ve ion): m/z 1022.69 ( $[2M-3H]^+$ , 71%), 513.18 ( $[M+H]^+$ , 69 %), 336.23 ( $[M-2,6\text{-di(isopropyl)amine}]^+$ , 100 %), IR (KBr):  $\nu$  3400 (NH), 1442 (C-N)  $cm^{-1}$ .

### Synthesis of $L^{AmR}$

**Method 1:** To a solution of  $L^{ImR}$  (2.5 g, 8.2 mmol) in MeOH (40 mL) was added  $NaBH_4$  (1.56 g, 41.1 mmol). The resulting solution was stirred for 2 h at room temperature after which the solvent was evaporated under reduced pressure. The residues were extracted into a mixture of  $CH_2Cl_2$  (10 mL) and water (10 mL) and the organic phase dried over  $MgSO_4$ . The solvents were evaporated under reduced pressure to afford 2.3 g, 92 % of  $L^{AmR}$  as a colourless solid.

**Method 2:** A mixture of tert-butylamine (2 mL) and 1,4-dibromomethyl-2,3,5,6-tetramethylbenzene (0.1 g, 0.313 mmol) was heated to reflux for 8 h. The resulting precipitate was isolated by filtration under reduced pressure and dried under vacuum to afford 0.038 mg, 40 %  $L^{AmR}$  as a colourless solid.

$^1H$  NMR (400 MHz,  $CDCl_3$ ):  $\delta_H$  3.73 (s, 4H,  $CH_2$ ), 2.31 (s, 12H, Me), 1.22 (s, 18H,  $tBu$ );  $^{13}C\{^1H\}$  NMR (500 MHz,  $CDCl_3$ ):  $\delta_C$  135.8 (q), 133.2 (q), 50.5 (q), 41.6, 29.1, 15.1; Found: C, 78.91, H, 12.00, N, 9.24 %  $C_{20}H_{36}N_2$  requires: C, 78.88, H, 11.92, N, 9.20 %; ESIMS (+ve ion): m/z 304.97 ( $[M]^+$ , 100%), 232.05 ( $[M-tBuN]^+$ , 44.1 %), IR (KBr):  $\nu$  3334 (NH), 1473 (C-C), 1228 (CN)  $cm^{-1}$

### Synthesis of $[H_2L^{AmR}][CoCl_4]$

To a solution of  $L^{AmR}$  (0.1 g, 0.328 mmol) in  $Et_2O$  (10 mL) was added a solution HCl (0.024 g, 0.657 mmol) in  $Et_2O$  (2 mL). The resulting solution was stirred for 30 min after which a suspension of  $CoCl_2$  (0.043 g, 0.33 mmol) in  $Et_2O$  (5 mL) was added. The resulting mixture was stirred at room temperature for 1 h after which the resulting precipitate was filtered under reduced pressure and washed with  $Et_2O$  (3 x 5 mL) to afford 0.138 g, 63 % of  $[H_2L^{AmR}][CoCl_4]$  as blue solids.

Found: C, 47.45, H, 7.58, N, 5.37 %  $C_{20}H_{36}Cl_4CoN_2$  requires: C, 47.54, H, 7.18, N, 5.54 %; IR (KBr):  $\nu$  3419 (NH), 1635 (C-C aromatic), 1593 (C=N)  $cm^{-1}$

### Synthesis of $[H_2L^{ImAr}][Zn_4Cl_{10}]$

To a solution of  $L^{ImAr}$  (0.1 g, 0.195 mmol) in  $Et_2O$  (10 mL), was added a solution HCl (0.0142 g, 0.4 mmol) in  $Et_2O$  (2 mL). The resulting solution was stirred for 30 minutes after which a solution of  $ZnCl_2$  (0.106 g, 0.78 mmol) in  $Et_2O$  (5 mL) was added. The mixture was stirred at room temperature for 1 h and the resulting precipitate filtered under reduced pressure and washed with  $Et_2O$  (3 x 5 mL) to afford 0.138 g, 63 % of  $[H_2L^{ImAr}][Zn_4Cl_{10}]$  as a colourless solid.

Found: C, 38.46, H, 4.52, N, 2.31 %  $C_{36}H_{50}Cl_{10}N_2Zn_4$  requires: C, 38.37, H, 4.47, N, 2.49 %; IR (KBr):  $\nu$  3587 (NH), 1653 (C=N), 1608 (C=C)  $cm^{-1}$

### Synthesis of $[Pd_3Cl_6(L^{ImAr})]$

A solution of  $PdCl_2(MeCN)_2$  (0.15 g, 0.585 mmol) in  $CH_2Cl_2$  (15 mL) was added slowly to a solution of  $L^{ImAr}$  (0.1 g, 0.192 mmol) in  $CH_2Cl_2$  (5 mL). The mixture was stirred for 3 h at room temperature, after which the precipitate was filtered, washed with hexane (3 x 5 mL), and dried under vacuum to afford 0.140 g, 70 % of  $[Pd_3Cl_6(L^{ImAr})]$  as a red solid.

$^1H$  NMR (500 MHz,  $CDCl_3$ ):  $\delta_H$  8.38 (s, 2H, imine CH), 7.50–7.25 (m, 6H, aromatic), 3.75 (s, 6H, aryl  $CH_3$ ), 3.56 (sep,  $^3J_{HH} = 6.97$  Hz, 2H, isopropyl CH), 3.49 (sep,  $^3J_{HH} = 6.97$  Hz, 2H, isopropyl CH), 2.09 (s, 6H, aryl  $CH_3$ ), 1.85 (d,  $^3J_{HH} = 6.97$  Hz, 6H, Me), 1.48 (d,  $^3J_{HH} = 6.97$  Hz, 6H, Me), 1.25 (d,  $^3J_{HH} = 6.97$  Hz, 6H, Me), 1.23 (d,  $^3J_{HH} = 6.97$  Hz, 6H, Me);  $^{13}C\{^1H\}$  NMR (500 MHz,  $CDCl_3$ ):  $\delta_C$  180.5, 145.5 (q), 141.7 (q), 141.5 (q), 137.4 (q), 135.7 (q), 133.8 (q), 129.2, 125.3, 124.7, 29.1, 28.6, 26.1, 25.2, 24.4, 23.7, 20.9, 17.0; Found: C, 41.39, H, 4.58, N, 2.54 %  $C_{36}H_{48}Cl_6N_2Pd_3$  requires: C, 41.55, H, 4.65, N, 2.69 %; ESIMS (+ve ion): m/z 507.49 ( $[L-H]^+$ , 92 %), 613.21 ( $[L + Pd]^+$ , 27 %) 717.17 ( $[L + 2Pd]^+$ , 82 %), 757.15 ( $[L + Pd_2Cl]^+$ , 80 %), 860.96 ( $[L + Pd_2Cl_4]^+$ , 100 %) ; IR (ATR):  $\nu$  1608 (C=N), 1590 (C=C)  $cm^{-1}$ ; UV-vis ( $CHCl_3$ , 25 °C):  $\lambda_{max}$  431 nm ( $\epsilon = 2711.4$   $dm^3 mol^{-1} cm^{-1}$ ).

### Synthesis of $[\text{Pd}_3\text{Cl}_6(\text{L}^{\text{ImR}})]$

To a solution of  $\text{PdCl}_2(\text{MeCN})_2$  (0.26 g, 0.985 mmol) in  $\text{CH}_2\text{Cl}_2$  (15 mL) was slowly added to a solution of  $\text{L}^{\text{ImR}}$  (0.1 g, 0.328 mmol) in  $\text{CH}_2\text{Cl}_2$  (5 mL). The mixture was stirred for 3 h at room temperature, after which the resulting precipitate was filtered, washed with hexane (3 x 5 mL), and dried under vacuum to afford 0.21 g, 77 % of  $[\text{Pd}_3\text{Cl}_6(\text{L}^{\text{ImR}})]$  as red solids.

$^1\text{H}$  NMR (400MHz,  $\text{CDCl}_3$ ):  $\delta_{\text{H}}$  8.45 (s, 2H, CH imine), 2.94 (s, 6H,  $\text{CH}_3$ ), 1.90 (s, 6H,  $\text{CH}_3$ ), 1.86 (s, 18H,  $^t\text{Bu}$ );  $^{13}\text{C}\{^1\text{H}\}$  NMR (500 MHz,  $\text{CDCl}_3$ ):  $\delta_{\text{C}}$  176.8, 136.4 (q), 134.3 (q), 132.2 (q), 68.0 (q), 32.5, 20.5, 17.2; Found: C, 29.01, H, 3.71, N, 3.26 %  $\text{C}_{20}\text{H}_{32}\text{Cl}_6\text{N}_2\text{Pd}_3$  requires: C, 28.86, H, 3.87, N, 3.37 %; ESIMS (+ve ion):  $m/z$  299.28 ( $[\text{L}-2\text{H}^+]$ , 100 %), 549.04 ( $[\text{L}+2\text{Pd}+\text{Cl}]$ , 81 %), 682.01 ( $[\text{L}+\text{Pd}_3\text{Cl}_5]$ , 73 %), IR (ATR):  $\nu$  1628 (C=N)  $\text{cm}^{-1}$ , UV-vis ( $\text{CHCl}_3$ , 25 °C):  $\lambda_{\text{max}}$  310 nm ( $\epsilon = 5421.8 \text{ dm}^3\text{mol}^{-1}\text{cm}^{-1}$ ).

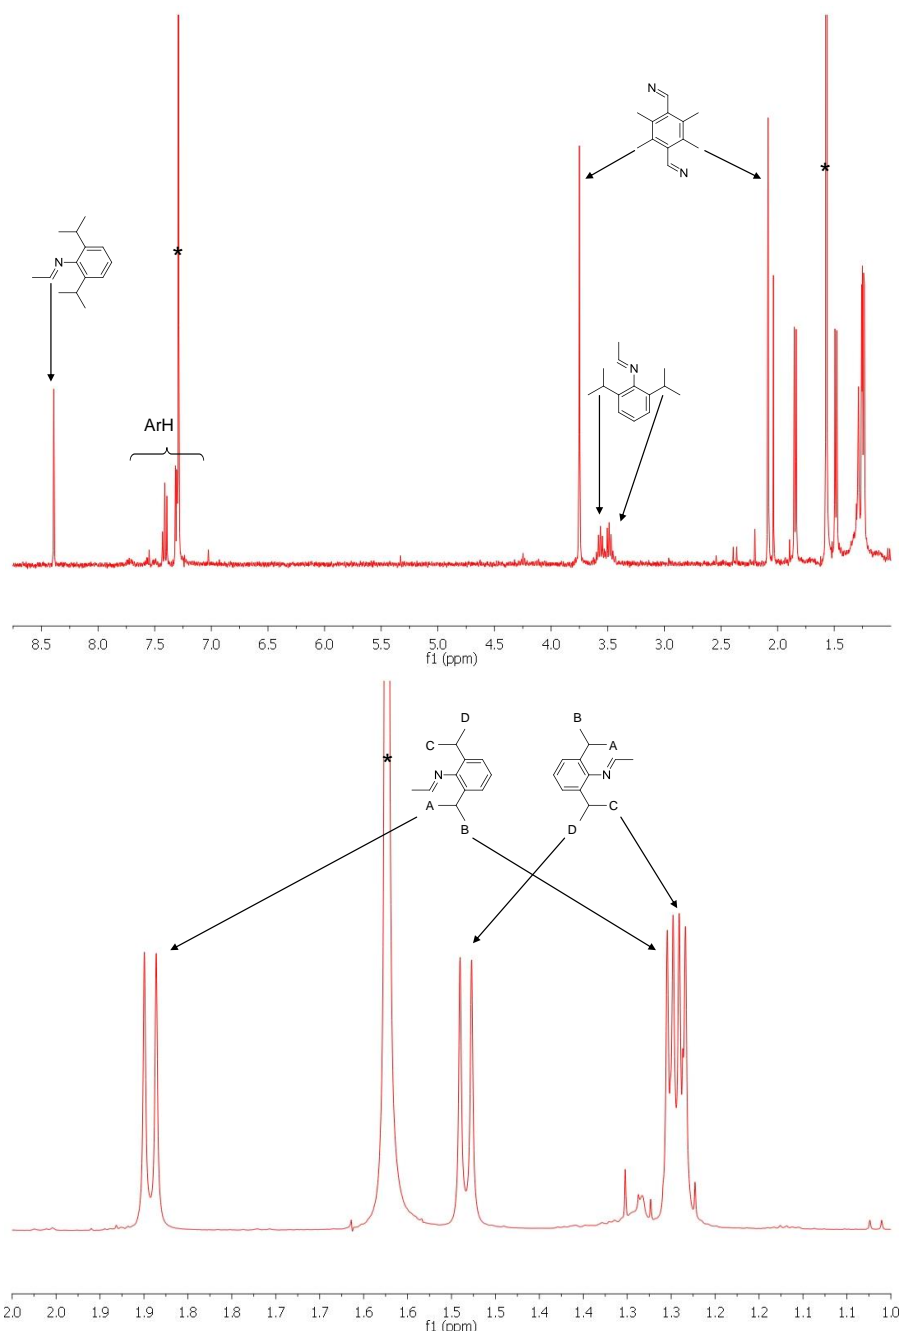

**Figure S1**  $^1\text{H}$  NMR spectra of  $[\text{Pd}_3\text{Cl}_6(\text{L}^{\text{ImAr}})]$  in  $\text{CDCl}_3$  (\* residual  $\text{CHCl}_3$  and  $\text{H}_2\text{O}$ ). Top: full spectrum; Bottom: expansion of 2.0-1.0 ppm region.

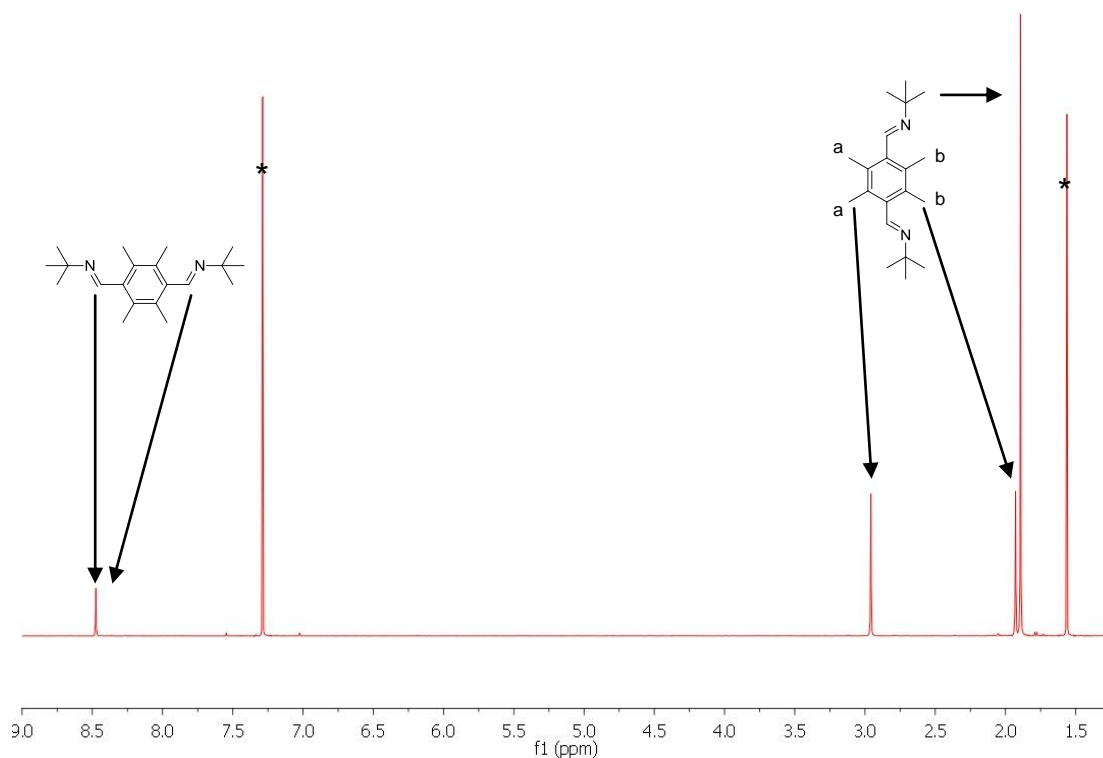

**Figure S2**  $^1\text{H}$  NMR spectrum of  $[\text{Pd}_3\text{Cl}_6(\text{L}^{\text{ImR}})]$  in  $\text{CDCl}_3$  (\* residual  $\text{CHCl}_3$  and  $\text{H}_2\text{O}$ )

### Crystallographic details

Single-crystal X-ray diffraction data were collected at 150 K using either a Bruker Apex II CCD diffractometer or an Oxford Diffraction Xcalibur Eos diffractometer equipped with an Eos detector, with graphite monochromated  $\text{MoK}\alpha$  radiation ( $\lambda = 0.71073\text{\AA}$ ) or using an Oxford Diffraction SuperNova Dual Atlas diffractometer with graphite-monochromated  $\text{CuK}\alpha$  radiation ( $\lambda = 1.54180\text{\AA}$ ) (see Table S1 for details). The structures were solved by direct methods using the WinGX suite of programs<sup>3</sup> and refined using full-matrix least square refinement on  $|F^2|$  using SHELXTL-97.<sup>4</sup> Unless otherwise stated, all non-hydrogen atoms were refined with anisotropic displacement parameters while hydrogen atoms were placed at calculated position and included as part of a riding model. The amine hydrogens in  $\text{L}^{\text{AmAr}}$ , ammonium hydrogens in  $[\text{H}_2\text{L}^{\text{AmR}}][\text{CoCl}_4]$  and iminium hydrogens in  $[\text{H}_2\text{L}^{\text{ImAr}}][\text{Zn}_4\text{Cl}_{10}]$  were located from the difference Fourier map and refined with riding thermal parameters and bond distance restraints. In  $[\text{Pd}_3\text{Cl}_6(\text{L}^{\text{ImR}})]$ , one tertiary butyl group had 3-fold rotational disorder and was modelled over two sites with 0.66:0.34 occupancy and anisotropic atomic displacement parameters. In  $[\text{Pd}_3\text{Cl}_6(\text{L}^{\text{ImAr}})]$ , the structure suffers from whole molecule disorder, with an occupancy ratio of 0.8878(18):0.1122. Within the minor component the Pd atoms were refined freely and isotropically; the Cl positional parameters were refined, but a common isotropic displacement parameter was refined. The ligand atoms were treated as an overall rigid group with an isotropic displacement parameter fixed at  $0.06\text{\AA}^2$ . Both molecules were restrained to be geometrically similar. Within the major component, only the Pd and Cl atoms were refined isotropically. Allowing the light atoms to refine with adps reduced R1 only modestly, but led to a number of atoms adopting physically unreasonable adps. This is probably a consequence of the whole-molecule disorder.

1. A. W. Van der Made and R. H. Van der Made, *J. Org. Chem.*, 1993, **58**, 1262-1263.
2. Y.-T. Chan, X. Li, M. Soler, J.-L. Wang, C. Wesdemiotis and G. R. Newkome, *J. Am. Chem. Soc.*, 2009, **131**, 16395-16397.
3. L. J. Farrugia, *J. Appl. Cryst.*, 1999, **32**, 837-838.
4. G. M. Sheldrick, *Acta Cryst.*, 2008, **A64**, 112-122.

**Table S1** Crystal data for  $L^{ImAr}$ ,  $L^{AmAr}$ ,  $[H_2L^{AmR}][CoCl_4]$

|                                                                            | $L^{ImAr}$                                    | $L^{AmAr}$                                                             | $[H_2L^{AmR}][CoCl_4]$                                                 |
|----------------------------------------------------------------------------|-----------------------------------------------|------------------------------------------------------------------------|------------------------------------------------------------------------|
| Chemical formula                                                           | $C_{36}H_{48}N_2$                             | $C_{36}H_{52}N_2$                                                      | $C_{20}H_{38}N_2 \cdot Cl_4Co \cdot CHCl_3 \cdot H_2O$                 |
| $M_r$                                                                      | 508.76                                        | 512.80                                                                 | 644.64                                                                 |
| Crystal system, space group                                                | Monoclinic, $P2_1/c$                          | Monoclinic, $C2/c$                                                     | Monoclinic, $P2_1/c$                                                   |
| Temperature (K)                                                            | 150                                           | 171                                                                    | 150                                                                    |
| $a, b, c$ (Å)                                                              | 8.4355 (9), 23.1135 (12), 9.0064 (9)          | 23.679 (3), 10.692 (1), 26.106 (4)                                     | 14.0602 (13), 12.1270 (9), 18.9923 (17)                                |
| $\alpha, \beta, \gamma$ (°)                                                | 90, 117.123 (13), 90                          | 109.228 (14)                                                           | 90, 107.588 (9), 90                                                    |
| $V$ (Å <sup>3</sup> )                                                      | 1562.9 (2)                                    | 6240.7 (12)                                                            | 3087.0 (5)                                                             |
| $Z$                                                                        | 2                                             | 8                                                                      | 4                                                                      |
| Radiation type                                                             | Mo $K\alpha$                                  | Mo $K\alpha$                                                           | Mo $K\alpha$                                                           |
| $\mu$ (mm <sup>-1</sup> )                                                  | 0.06                                          | 0.06                                                                   | 1.18                                                                   |
| Crystal size (mm)                                                          | 0.25 × 0.10 × 0.02                            | 0.22 × 0.09 × 0.02                                                     | 0.03 × 0.02 × 0.01                                                     |
| Diffractometer                                                             | Xcalibur, Eos diffractometer                  | Xcalibur, Eos diffractometer                                           | Xcalibur, Eos diffractometer                                           |
| Absorption correction                                                      | Multi-scan CrysAlisPro, Agilent Technologies, | Multi-scan CrysAlisPro, Agilent Technologies,                          | Multi-scan CrysAlisPro, Oxford Diffraction Ltd.                        |
| $T_{min}, T_{max}$                                                         | 0.897, 1.000                                  | 0.335, 1.000                                                           | 0.814, 1.000                                                           |
| No. of measured, independent and observed [ $I > 2\sigma(I)$ ] reflections | 11022, 3937, 2837                             | 40816, 8429, 5606                                                      | 23685, 6533, 4804                                                      |
| $R_{int}$                                                                  | 0.031                                         | 0.053                                                                  | 0.040                                                                  |
| $R[F^2 > 2\sigma(F^2)], wR(F^2), S$                                        | 0.065, 0.176, 1.02                            | 0.064, 0.171, 1.01                                                     | 0.050, 0.117, 1.02                                                     |
| No. of reflections                                                         | 3937                                          | 8429                                                                   | 6533                                                                   |
| No. of parameters                                                          | 178                                           | 363                                                                    | 317                                                                    |
| No. of restraints                                                          | 0                                             | 0                                                                      | 0                                                                      |
| H-atom treatment                                                           | H-atom parameters constrained                 | H atoms treated by a mixture of independent and constrained refinement | H atoms treated by a mixture of independent and constrained refinement |
| $\Delta_{max}, \Delta_{min}$ (e Å <sup>-3</sup> )                          | 0.41, -0.28                                   | 0.31, -0.24                                                            | 1.29, -0.72                                                            |

**Table S2**  $[\text{H}_2\text{L}^{\text{ImAr}}][\text{Zn}_4\text{Cl}_{10}]$ ,  $[\text{Pd}_3\text{Cl}_6(\text{L}^{\text{ImAr}})]$ ,  $[\text{Pd}_3\text{Cl}_6(\text{L}^{\text{ImR}})]$

|                                                                            | $[\text{H}_2\text{L}^{\text{ImAr}}][\text{Zn}_4\text{Cl}_{10}]$        | $[\text{Pd}_3\text{Cl}_6(\text{L}^{\text{ImAr}})]$           | $[\text{Pd}_3\text{Cl}_6(\text{L}^{\text{ImR}})]$                                  |
|----------------------------------------------------------------------------|------------------------------------------------------------------------|--------------------------------------------------------------|------------------------------------------------------------------------------------|
| Chemical formula                                                           | $\text{C}_{36}\text{H}_{50}\text{N}_2\cdot\text{Cl}_{10}\text{Zn}_4$   | $\text{C}_{36}\text{H}_{50}\text{Cl}_6\text{N}_2\text{Pd}_3$ | $\text{C}_{20}\text{H}_{32}\text{Cl}_6\text{N}_2\text{Pd}_3\cdot 2(\text{CHCl}_3)$ |
| $M_r$                                                                      | 1126.76                                                                | 1042.68                                                      | 1071.11                                                                            |
| Crystal system, space group                                                | Triclinic, $P\bar{1}$                                                  | Monoclinic, $Cc$                                             | Monoclinic, $P2_1/n$                                                               |
| Temperature (K)                                                            | 150                                                                    | 150                                                          | 150                                                                                |
| $a, b, c$ (Å)                                                              | 9.5094 (8), 10.1009 (8), 13.8791 (10)                                  | 15.708 (3), 18.709 (3), 14.422 (2)                           | 14.0862 (4), 12.8822 (3), 20.1228 (4)                                              |
| $\alpha, \beta, \gamma$ (°)                                                | 88.205 (6), 85.706 (6), 61.321 (8)                                     | 90, 101.312 (18), 90                                         | 90, 96.349 (2), 90                                                                 |
| $V$ (Å <sup>3</sup> )                                                      | 1166.29 (16)                                                           | 4155.9 (12)                                                  | 3629.11 (15)                                                                       |
| $Z$                                                                        | 1                                                                      | 4                                                            | 4                                                                                  |
| Radiation type                                                             | Mo $K\alpha$                                                           | Mo $K\alpha$                                                 | Cu $K\alpha$                                                                       |
| $\mu$ (mm <sup>-1</sup> )                                                  | 2.63                                                                   | 1.70                                                         | 20.15                                                                              |
| Crystal size (mm)                                                          | 0.05 × 0.02 × 0.01                                                     | 0.19 × 0.04 × 0.03                                           | 0.02 × 0.01 × 0.01                                                                 |
| Diffractometer                                                             | Xcalibur, Eos diffractometer                                           | Xcalibur, Eos diffractometer                                 | SuperNova, Dual, Cu at zero, Atlas diffractometer                                  |
| Absorption correction                                                      | Multi-scan CrysAlisPro, Oxford Diffraction Ltd.,                       | Multi-scan CrysAlisPro, Oxford Diffraction Ltd.,             | Multi-scan CrysAlisPro, Agilent Technologies,                                      |
| $T_{\text{min}}, T_{\text{max}}$                                           | 0.807, 1.000                                                           | 0.956, 1.000                                                 | 0.478, 1.000                                                                       |
| No. of measured, independent and observed [ $I > 2\sigma(I)$ ] reflections | 12460, 4663, 3703                                                      | 14947, 7313, 5844                                            | 33867, 6914, 5952                                                                  |
| $R_{\text{int}}$                                                           | 0.028                                                                  | 0.057                                                        | 0.065                                                                              |
| $R[F^2 > 2\sigma(F^2)]$ , $wR(F^2)$ , $S$                                  | 0.031, 0.075, 1.01                                                     | 0.064, 0.160, 1.06                                           | 0.043, 0.120, 1.05                                                                 |
| No. of reflections                                                         | 4663                                                                   | 7313                                                         | 6914                                                                               |
| No. of parameters                                                          | 244                                                                    | 287                                                          | 387                                                                                |
| No. of restraints                                                          | 0                                                                      | 143                                                          | 0                                                                                  |
| H-atom treatment                                                           | H atoms treated by a mixture of independent and constrained refinement | Riding                                                       | H-atom parameters constrained                                                      |
| $\Delta_{\text{max}}, \Delta_{\text{min}}$ (e Å <sup>-3</sup> )            | 0.56, -0.31                                                            | 1.79, -0.80                                                  | 1.70, -1.37                                                                        |
| Absolute structure                                                         | N/A                                                                    | Flack H D (1983), Acta Cryst. A39, 876-881                   | N/A                                                                                |
| Flack parameter                                                            | N/A                                                                    | 0.58 (7)                                                     | N/A                                                                                |

CrysAlisPro, Oxford Diffraction Ltd., Version 1.171.33.55 (release 05-01-2010 CrysAlis171 .NET) (compiled Jan 5 2010,16:28:46)  
 Empirical absorption correction using spherical harmonics, implemented in SCALE3 ABSPACK scaling algorithm.  
 Computer programs: SMART (Siemens, 1993), CrysAlisPro, Oxford Diffraction Ltd., Version 1.171.33.55 (release 05-01-2010 CrysAlis171 .NET) (compiled Jan 5 2010,16:28:46), SAINT (Siemens, 1995), SHELXS97 (Sheldrick, 1990), SHELXS97 (Sheldrick, 2008), SHELXL97 (Sheldrick, 1997), SHELXL97 (Sheldrick, 2008), ORTEP (Farrugia, 1997), enCIFer (Allen *et al.*, 2004).
